# Supplementary material
Source: Springer Nature journal article supplement (https://www.springermedizin.de/resource/supplementary/12937_2009_270_MOESM6_ESM.pdf/25654754)

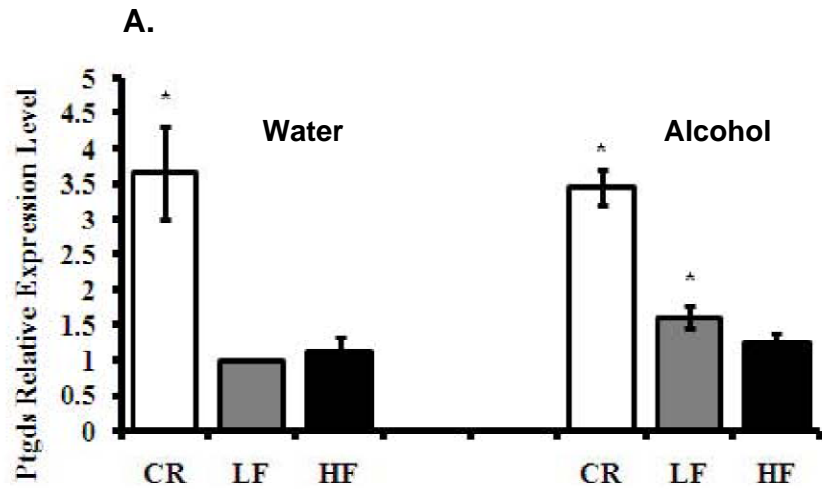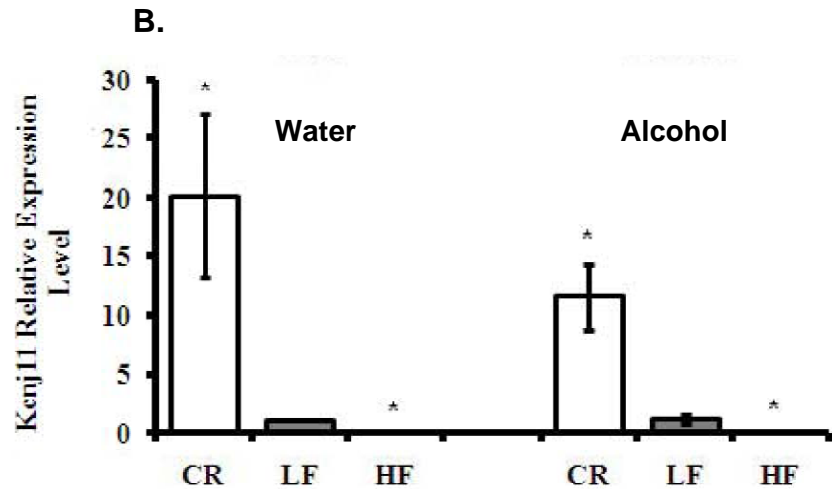

Supplement: MOESM6 [file 25654754]
